# Supplementary material
Source: MDPI journal article supplement (https://www.mdpi.com/2072-6694/12/4/945)
Supplement: s1 [file s1]

Archive with 1 entries (1 files):
- cancers-745255-supp-final-done.pdf
